# Supplementary material
Source: Royal Society of Chemistry journal article supplement (doi:10.1039/d6ce00284f)
Supplement: d6ce00284f1.pdf [file d6ce00284f1.pdf]

## Supplementary Information

### Oblique Angle Deposition of Self-assembled Zigzag-shaped Au Nanostructures in $\text{La}_{0.7}\text{Sr}_{0.3}\text{MnO}_3$ -Au Vertically Aligned Nanocomposite Thin Films

Benson Kunhung Tsai <sup>a</sup>, Jialong Huang <sup>a</sup>, Abhijeet Choudhury <sup>a</sup>, Allison Nobuko Scher <sup>a</sup>,  
Jeremy B. Gan <sup>a</sup>, Peter Bermel\* <sup>b</sup>, Haiyan Wang\* <sup>a,b</sup>

<sup>a</sup> School of Materials Engineering, Purdue University, West Lafayette, Indiana 47907, United States.

<sup>b</sup> School of Electrical and Computer Engineering, Purdue University, West Lafayette, Indiana 47907, United States.

\*Corresponding Author: [hwang00@purdue.edu](mailto:hwang00@purdue.edu)

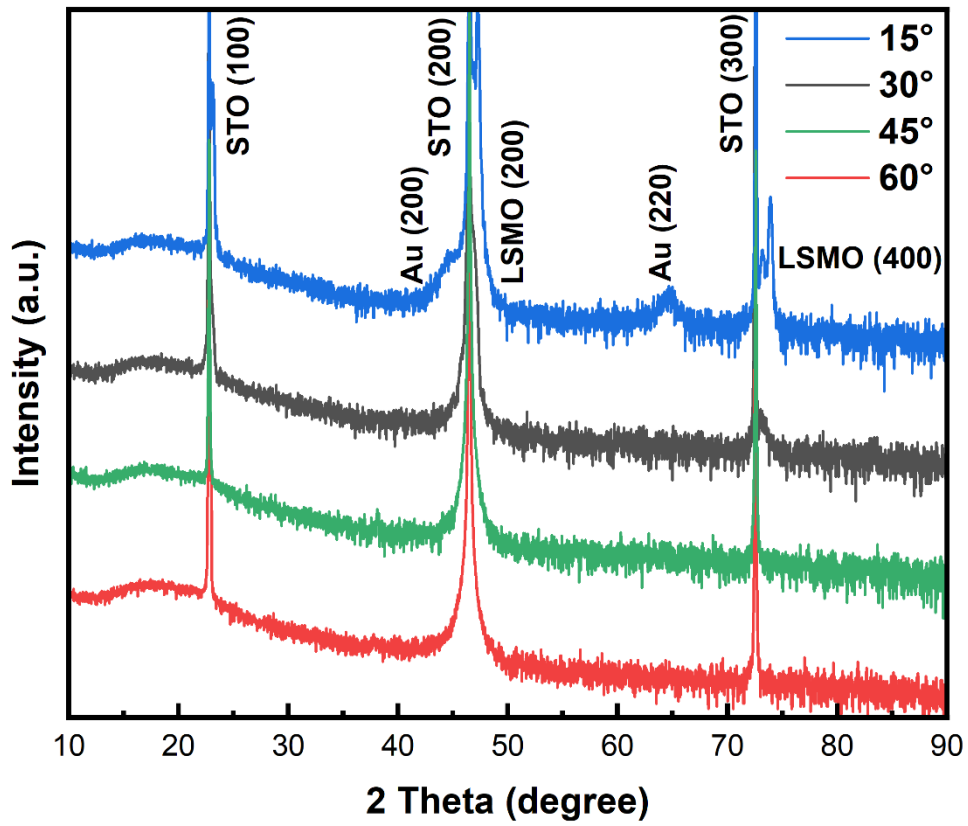

Figure S1. Different tilting angles deposition sample X-Ray diffraction results comparison

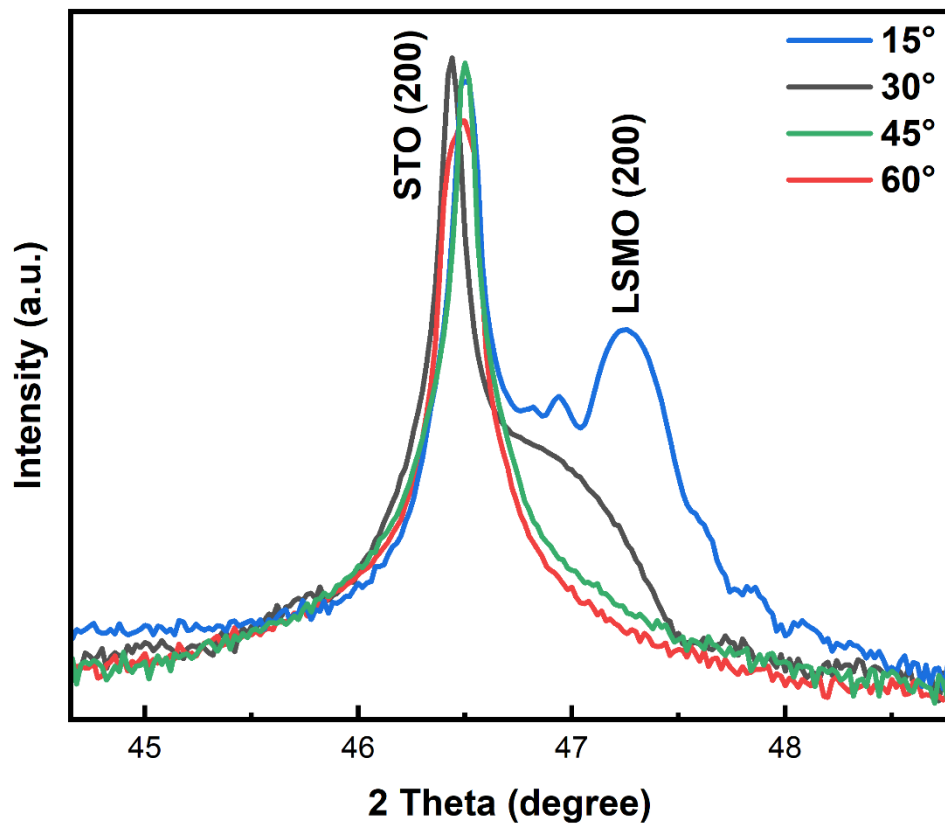

Figure S2. Zoom-in images of detailed LSMO peaks shifting of different tilting angles deposition sample X-Ray diffraction results comparison

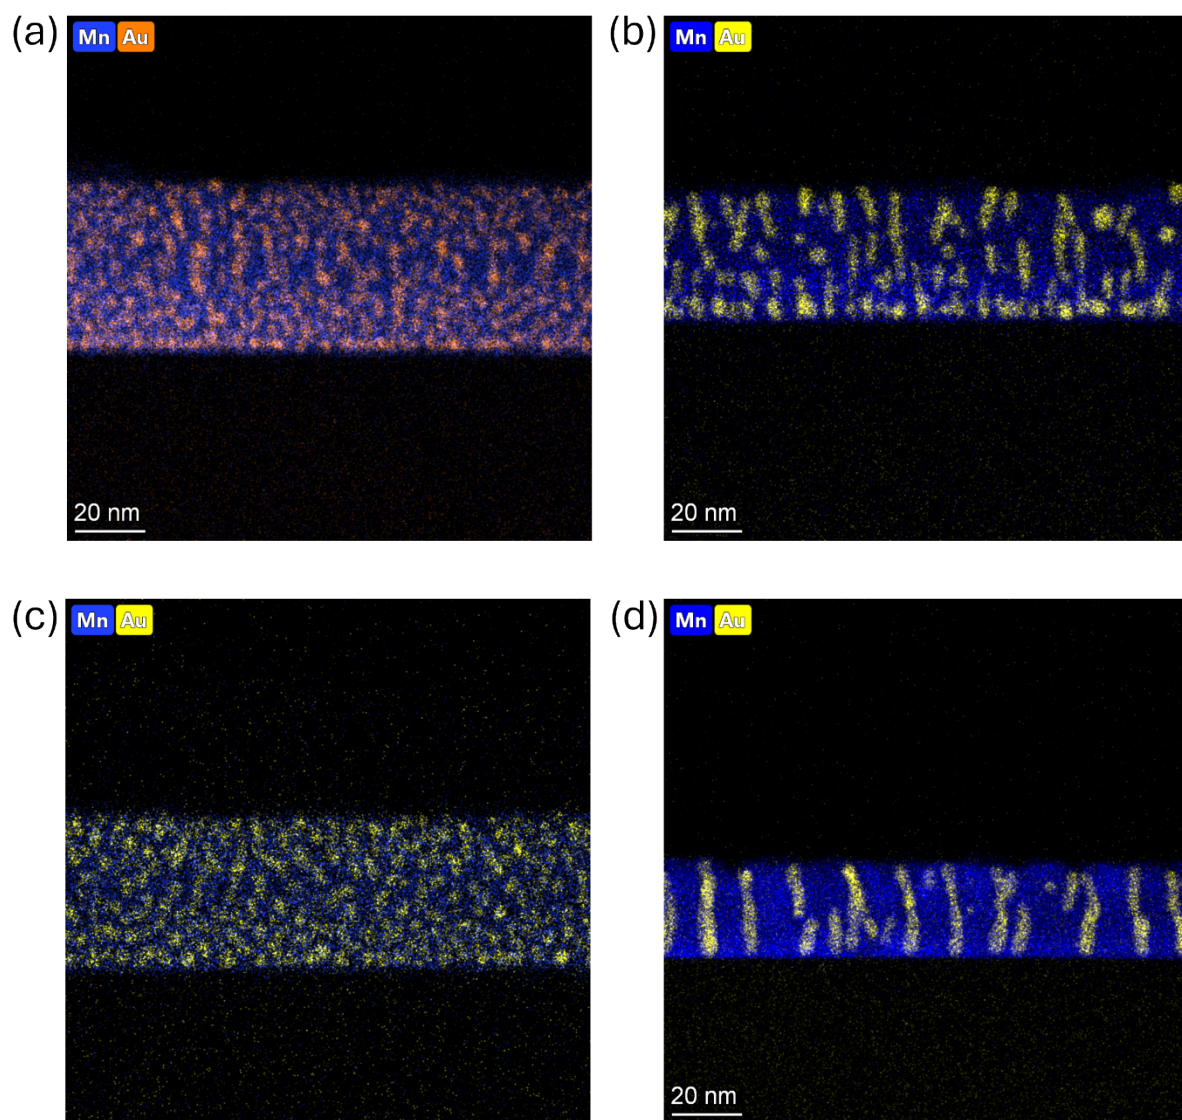

Figure S3. EDS mapping for Mn and Au of all four tilting samples

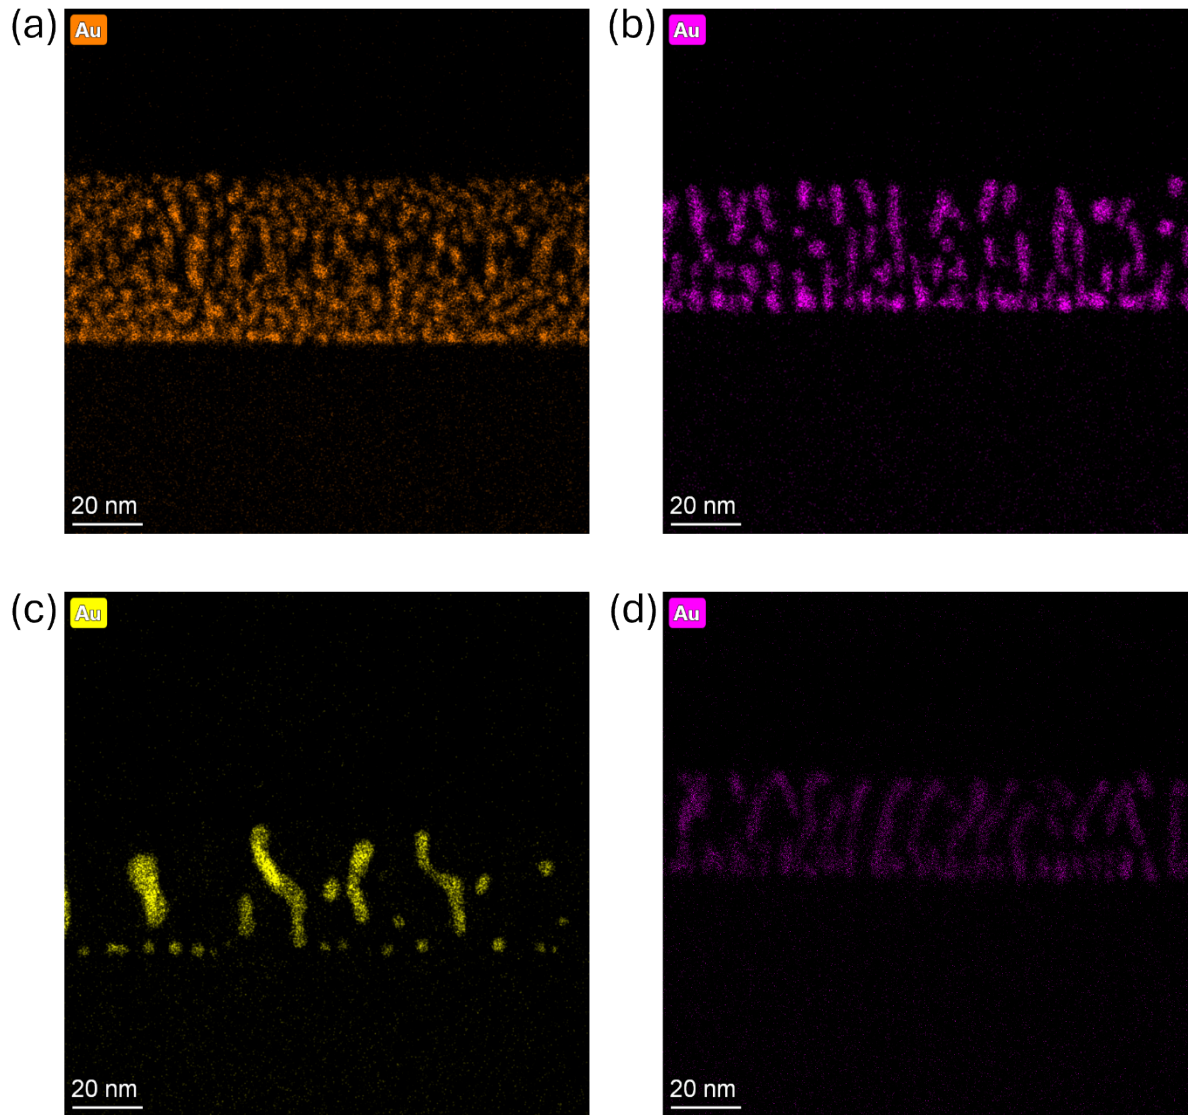

Figure S4. EDS mapping for Au of all four tilting samples to prove nanopillars curvature and bending status
